# Supplementary material for: Kidney Biopsy in Patients with Cancer along the Last Decade: A Multicenter Study
Source: MDPI journal article supplement (doi:10.3390/jcm11102915), 2022-05-21
Supplement: s1 [file s1]

**Supplementary material:**

|                         |                                                                                                               |
|-------------------------|---------------------------------------------------------------------------------------------------------------|
| Supplementary Table S1  | List of patients contributed by each participating hospital                                                   |
| Supplementary Figure S1 | Histological diagnoses and treatments classified into two time periods:<br>2010 to 2016 and from 2017 to 2021 |
| Supplementary Figure S2 | Opinion of the nephrologist                                                                                   |

**Supplementary Table S1**

List of patients contributed by each participating hospital:

| <b>Hospital</b>                   | <b>N</b> |
|-----------------------------------|----------|
| Vall d'Hebron University Hospital | 48       |
| Hospital Clinic Barcelona         | 20       |
| Fundación Alcorcón                | 14       |
| Bellvitge Hospital                | 13       |
| Córdoba Hospital                  | 13       |
| Dr. Josep Trueta Hospital         | 12       |
| Virgen Macarena Hospital          | 10       |
| Clínico San Carlos Hospital       | 7        |
| Gregorio Marañón Hospital         | 5        |
| Hospital del Mar                  | 3        |
| Virgen del Rocio Hospsital        | 2        |
| Navarra Hospital                  | 1        |

## Supplementary Figure S1

Histological diagnoses and treatments classified into two time periods: 2010 to 2016 and from

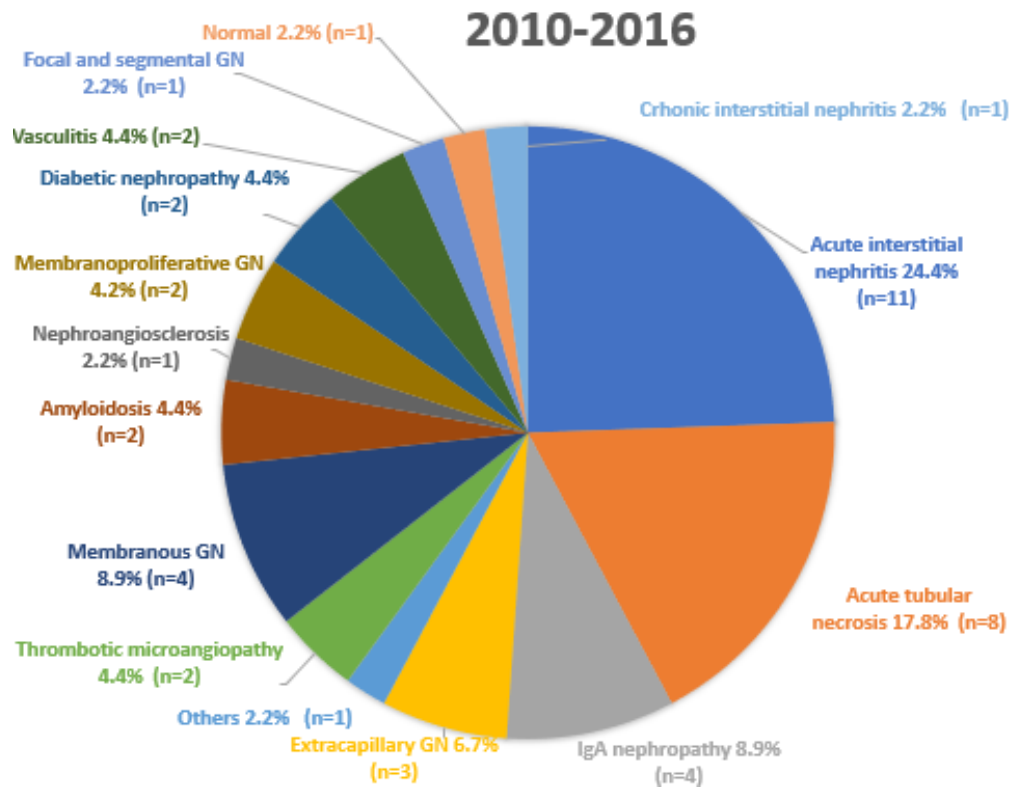

2017 to 2021.

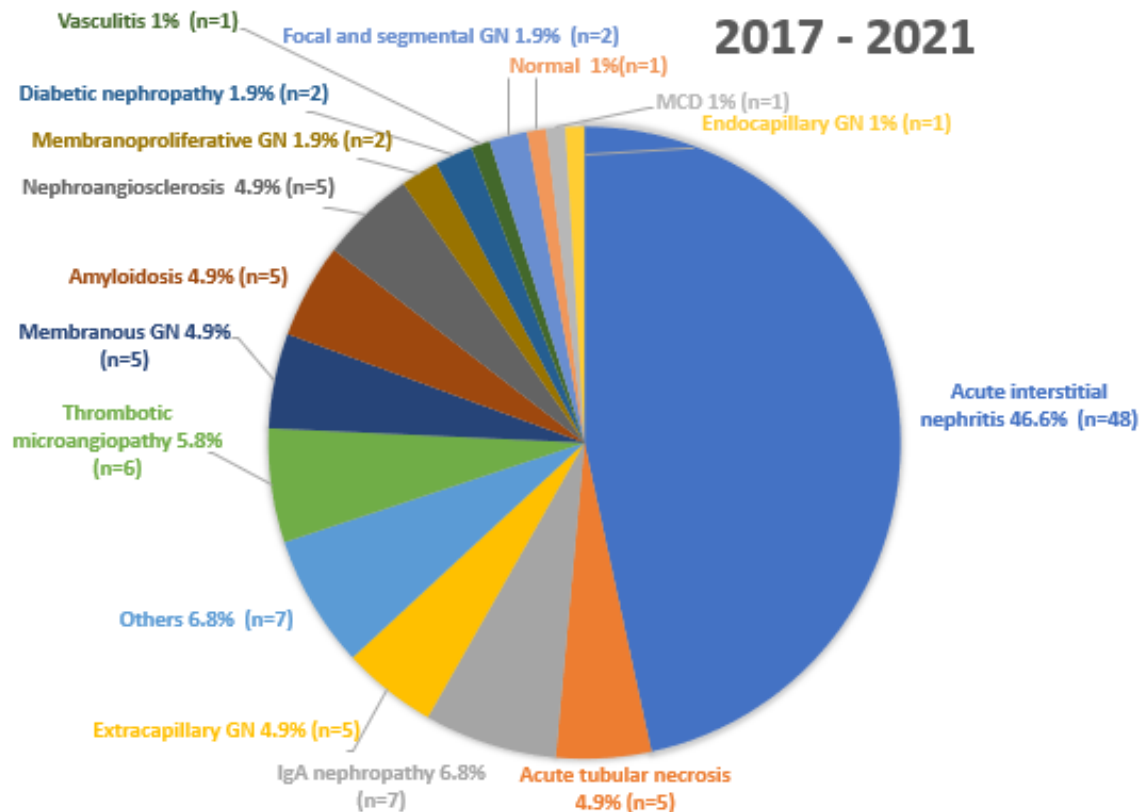

MCD: Minimal change disease

2010-2016 (N=45)

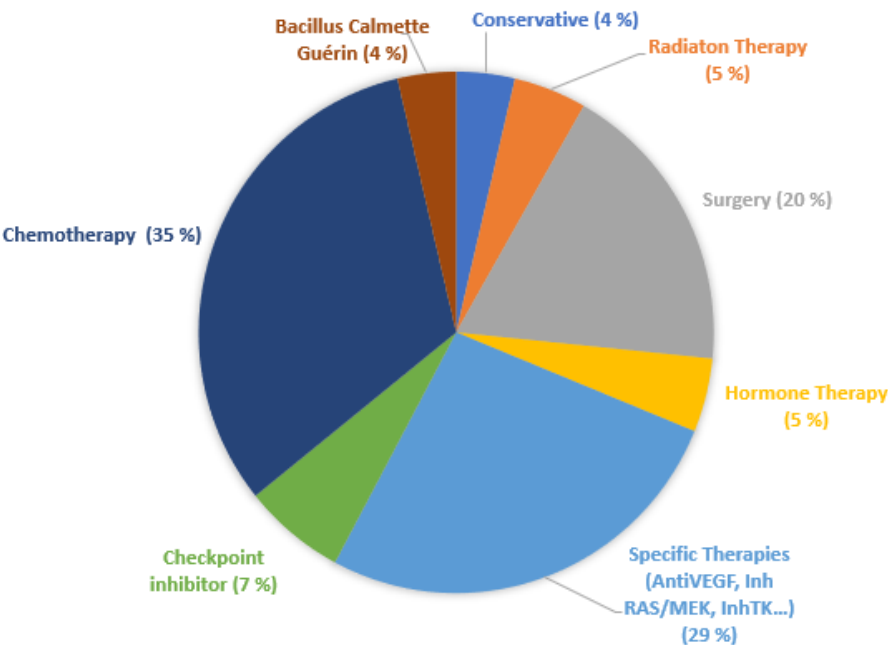

2017-2021 (N=137)

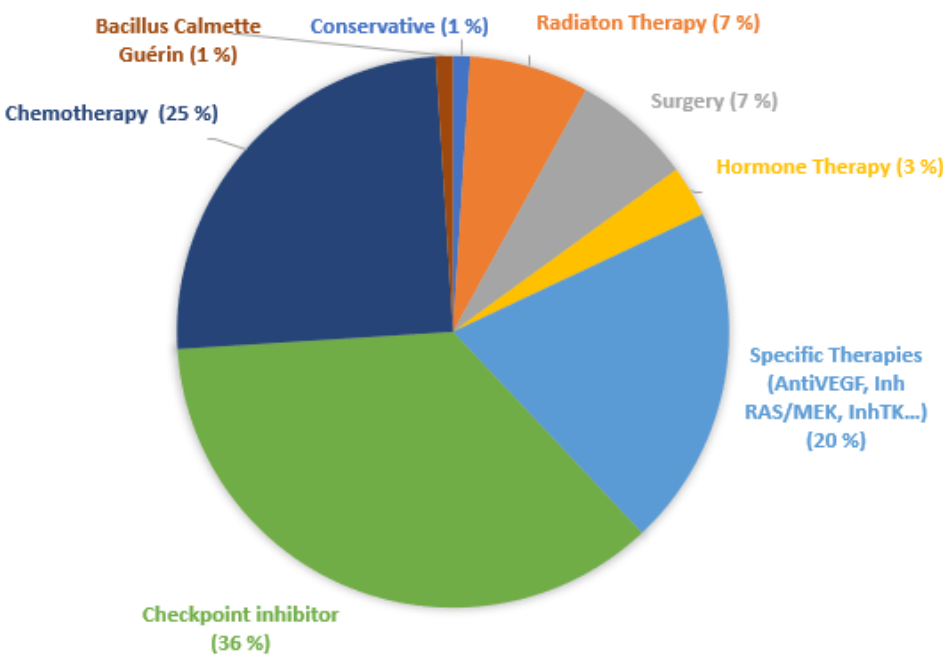

## Supplementary Figure S2

Opinion of the nephrologist.

### IN THE OPINION OF THE NEPHROLOGIST (N=134), THE HISTOPATHOLOGICAL DIAGNOSIS WAS RELATED TO:

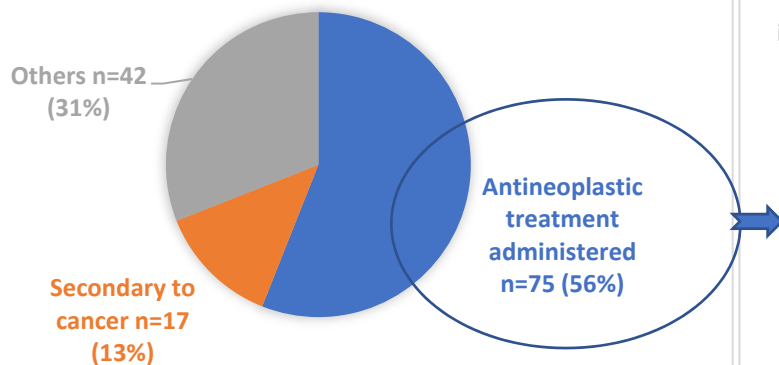

### TYPE OF TREATMENT ADMINISTERED

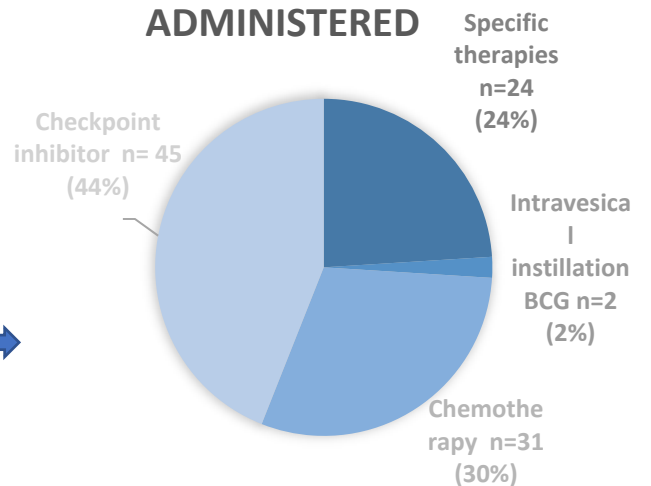

### Kidney biopsy diagnosis.

Diagnosis secondary to antineoplastic treatment: colored bar diagram.

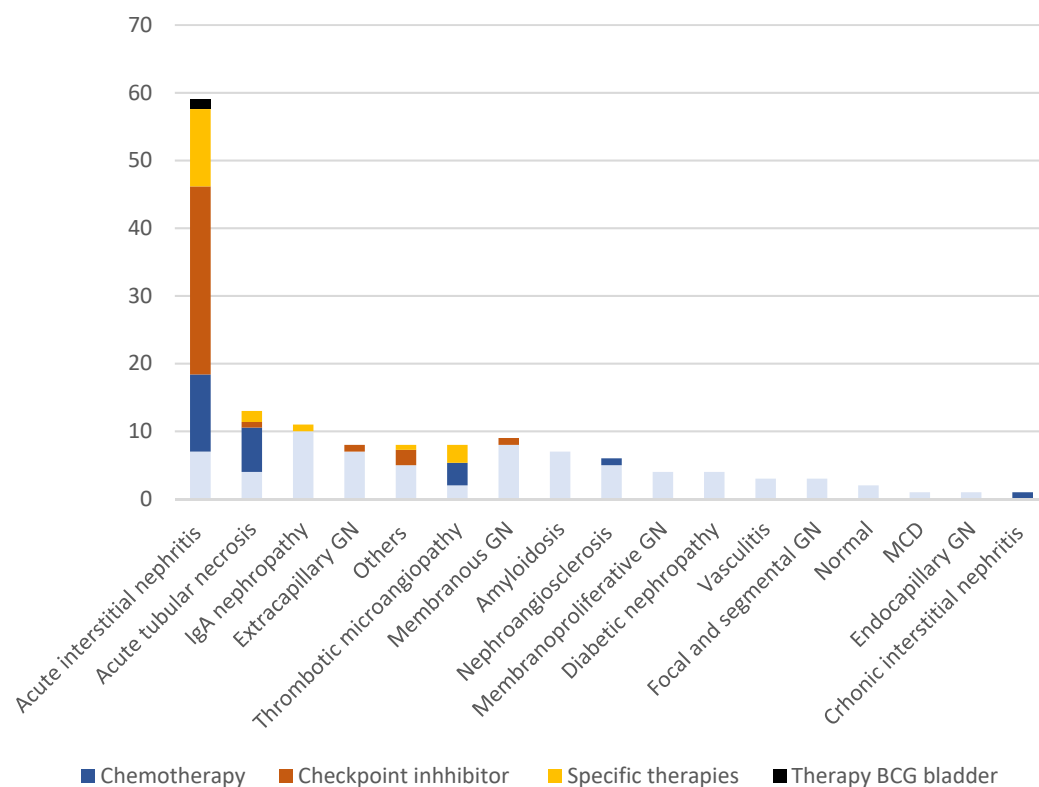

BCG: Bacillus Calmette Guérin.
